# Supplementary material for: Arabidopsis Class II Formins AtFH13 and AtFH14 Can Form Heterodimers but Exhibit Distinct Patterns of Cellular Localization
Source: PubMed Central journal article supplement (PMC6982070; doi:10.3390/ijms21010348), 2020-01-05
Supplement: ijms-21-00348-s001.pdf [file ijms-21-00348-s001.pdf]

## Supplementary data for Kollárová et al: Arabidopsis Class II formins AtFH13 and AtFH14 can form heterodimers but exhibit distinct patterns of cellular localization

The supplementary materials consist of the following:

**Figure S1:** Quantification of fluorescent protein-tagged AtFH13 and AtFH14 derivatives co-localization with other markers examined in this study (in this file),

**Table S1:** Summarization of cloning methods used for each entry clone (in this file).

**Table S2:** The combinations of entry clones and destination vectors used for generation of expression vectors used in this study (in this file).

**Table S3:** Summarization of primers, templates, destination vectors and restriction enzymes used to generate expression vectors for the yeast two hybrid assay (in this file).

**Video S1:** Co-expression of AtFH13-YFP with the microtubule marker KMD-RFP. Green: AtFH13-YFP. Magenta: KMD-RFP. Scale bar is 10  $\mu\text{m}$  (in a separate file S1.avi; saved using 2x JPEG compression, frame rate 10 fps).

**Video S2:** Co-expression of AtFH14-YFP with the microtubule marker KMD-RFP. Green: AtFH14-YFP. Magenta: KMD-RFP. Scale bar is 10  $\mu\text{m}$  (in a separate file S2.avi; saved using 2x JPEG compression, frame rate 10 fps).

**Video S3:** Co-expression of AtFH13-YFP with the endoplasmic reticulum marker ER-rk. Green: AtFH13-YFP. Magenta: ER-rk. Scale bar is 10  $\mu\text{m}$  (in a separate file S3.avi; saved using 1x JPEG compression, frame rate 10 fps).

**Video S4:** Co-expression of AtFH14-YFP with the endoplasmic reticulum marker ER-rk. Green: AtFH14-YFP. Magenta: ER-rk.. Scale bar is 10  $\mu\text{m}$  (in a separate file S4.avi; saved using 1x JPEG compression, frame rate 10 fps).

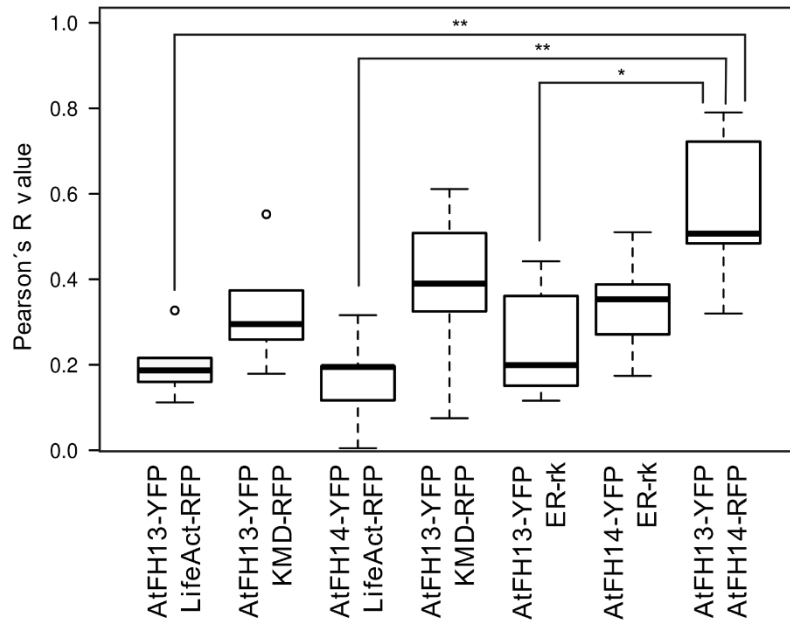

**Figure S1:** Quantification of fluorescent protein-tagged AtFH13 and AtFH14 derivatives co-localization with other markers examined in this study. Distribution of Pearson's correlation coefficients for the indicated fluorescent protein pairs is shown. Asterisks indicate statistically significant difference (ANOVA): \*\*  $p < 0.001$ ; \*  $p < 0.05$ .

**Table S1:** Summarization of cloning methods used for each entry clone with specified primers, template, type of donor vector and restriction enzymes (in case of restriction cloning). In the primer sequence, the restriction enzyme sites are underlined with a continuous line and the adaptors for GW cloning are underlined with a dotted line.

| Entry clone    | Cloning method      | Primer name            | Primer sequence (5'-3')                                                          | Template          | Donor vector           | Enzymes |
|----------------|---------------------|------------------------|----------------------------------------------------------------------------------|-------------------|------------------------|---------|
| pEN_gAtFH13    | Restriction cloning | FH13PTEN_TAIR          | ACT <u>GGTACCAA</u> ATGGCATTGTTTCGCAAATTG                                        | gDNA              | pENTR <sup>TM</sup> 1A | KpnI    |
|                |                     | FH13full_rev           | GTC <u>GGCCGAGG</u> AGCGGTTCTTTCCTTTAG                                           |                   |                        | EagI    |
| pEN_PTEN-FH13  | Restriction cloning | TAIR                   | ACT <u>GGTACCAA</u> ATGGCATTGTTTCGCAAATTG                                        | cDNA pACT library | pENTR <sup>TM</sup> 1A | KpnI    |
|                |                     | PTENrev                | CTT <u>GCGGCCG</u> ATTTGCAATGGCTAACTGC                                           |                   |                        | EagI    |
| pEN_PTENA-FH13 | Restriction cloning | TAIR                   | ACT <u>GGTACCAA</u> ATGGCATTGTTTCGCAAATTG                                        | cDNA pACT library | pENTR <sup>TM</sup> 1A | KpnI    |
|                |                     | PTENrev                | CTT <u>GCGGCCG</u> ATTTGCAATGGCTAACTGC                                           |                   |                        | EagI    |
| pEN_cAtFH14    | Restriction cloning | for_KpnI_CAMBIA14      | TT <u>GGTACCTT</u> CCAATGTCTTTGTTAAG                                             | cDNA AtFH14       | pENTR <sup>TM</sup> 1A | KpnI    |
|                |                     | rev_NotI_CAMBIA14      | TT <u>GCGGCCG</u> CCATGTTCTATGTCTATGGATC                                         |                   |                        | NotI    |
| pEN_FH2-FH14   | Restriction cloning | for_FH2/FH14_KpnI      | TT <u>GGTACCC</u> ATGGGACTTGGAAGAG                                               | cDNA AtFH14       | pENTR <sup>TM</sup> 1A | KpnI    |
|                |                     | rev_NotI_CAMBIA14      | TT <u>GCGGCCG</u> CCATGTTCTATGTCTATGGATC                                         |                   |                        | NotI    |
| pEN_PTEN-FH14  | Restriction cloning | FH14headKpn            | TT <u>GGTACC</u> CTAACAAGGTTCTTCCAATG                                            | gDNA              | pENTR <sup>TM</sup> 1A | KpnI    |
|                |                     | FH14headXho            | GGACT <u>CGAGG</u> GAAGATTCAAAGGGTTG                                             |                   |                        | XhoI    |
| pEN_FH2-FH13   | Gateway cloning     | FH2dom_FH13attB1       | <u>GGGGACAAGTTTGTACAAAAAAGCAGGCTTAATGTTACGTGT</u><br><u>TAATTTAAAGAATAGTCCAG</u> | gDNA              | pDONR221               | none    |
|                |                     | attB2AtFH13withoutSTOP | <u>GGGGACCACTTTGTACAAGAAAGCTGGGTTAGGAGCGGTTCT</u><br><u>TTCCTTTAG</u>            |                   |                        |         |

**Table S2:** The combinations of entry clones and destination vectors used for generation of expression vectors used in this study.

| <b>Expression vector</b> | <b>Entry clone</b>      | <b>Destination vector</b> |
|--------------------------|-------------------------|---------------------------|
| AtFH13-YFP               | pEN_gAtFH13             | pUBC-YFP-DEST             |
| FH2dom_FH13-GFP          | pEN_FH2-FH13            | pUBC-GFP-DEST             |
| PTEN_FH13-YFP            | pEN_PTEN-FH13           | pUBC-YFP-DEST             |
| PTEN $\Delta$ _FH13-YFP  | pEN_PTEN $\Delta$ -FH13 | pUBC-YFP-DEST             |
| AtFH14-YFP               | pEN_cAtFH14             | pUBC-YFP-DEST             |
| AtFH14-RFP               | pEN_cAtFH14             | pUBC-RFP-DEST             |
| FH2dom_FH14-YFP          | pEN_FH2-FH14            | pUBC-YFP-DEST             |
| PTEN_FH14-YFP            | pEN_PTEN-FH14           | pUBC-YFP-DEST             |

**Table S3:** Summarization of primers, templates, destination vectors and restriction enzymes used to generate expression vectors for the yeast two hybrid assay. In the primer sequences, restriction sites are underlined with a straight line.

| Expression vector | Primer name                           | Primer sequence (5'-3')           | Template     | Destination vector | Restriction enzymes |
|-------------------|---------------------------------------|-----------------------------------|--------------|--------------------|---------------------|
| AD:AtFH13         | AtFH13(FH2 domain)<br>pGAD/pGBKT7 for | TTGAATTCGTTAATTTAAAGAATAGTCCAGCCG | pEN_FH2-FH13 | pGADT7             | EcoRI               |
|                   | AtFH13(FH2 domain)<br>pGAD/pGBKT7 rev | TTGGATCCGTTCTTTCCTTTAGTCGGTCAC    |              |                    | BamHI               |
| DBD:AtFH13        | AtFH13(FH2 domain)<br>pGAD/pGBKT7 for | TTGAATTCGTTAATTTAAAGAATAGTCCAGCCG | pEN_FH2-FH13 | pGBKT7             | EcoRI               |
|                   | AtFH13(FH2 domain)<br>pGAD/pGBKT7 rev | TTGGATCCGTTCTTTCCTTTAGTCGGTCAC    |              |                    | BamHI               |
| AD::AtFH14        | AtFH14(FH2 domain)<br>pGADT7 for      | TTGAATTCAGGTTGGGTGCTCCCCCT        | pEN_cAtFH14  | pGADT7             | EcoRI,              |
|                   | AtFH14(FH2 domain)<br>pGADT7 rev      | TTCCCGGCTCTGCTGGATAAGATCGTTGTCGTT |              |                    | XmaI                |
